# Supplementary material for: Sleep apnoea increases biomarkers of immune evasion, lymphangiogenesis and tumour cell aggressiveness in high-risk patients and those with established lung cancer
Source: PubMed Central journal article supplement — ERJ Open Res. 2024 Feb 19;10(1):00777-2023. doi: 10.1183/23120541.00777-2023 (PMC10875459; doi:10.1183/23120541.00777-2023), 2024-02-19

## **Online Data Supplement**

**Sleep apnoea and lung cancer. Biomarkers of immune evasion, lymphangiogenesis  
and tumour cell aggressiveness**

Carolina Cubillos-Zapata, Fernanda Troncoso-Acevedo, Elena Díaz-García, Enrique  
Alfaro, Carolina Gotera-Rivera, Teresa Pérez-Warnisher, Germán Peces-Barba, Luis  
Seijo, Francisco García-Río

**Table S1.** Comparison of biomarker levels between subjects with or without lung cancer\*

|                      | <b>Non lung cancer</b><br>(n=131) | <b>Lung cancer</b><br>(n=39) | <b>p-value</b> |
|----------------------|-----------------------------------|------------------------------|----------------|
| TGF- $\beta$ , pg/ml | 8.9 (5.5-12.0)                    | 13.7 (12.4-17.6)             | <0.001         |
| SMAD3, pg/ml         | 2484 (1900-4594)                  | 5087 (4581-5243)             | <0.001         |
| CD137, pg/ml         | 41.9 (6.0-41.9)                   | 41.9 (6.3-82.4)              | 0.533          |
| MMP2, pg/ml          | 17110 (12668-24309)               | 23460 (19445-27438)          | <0.001         |
| PSPC1, pg/ml         | 5087 (4581-5243)                  | 2484 (1900-4594)             | <0.001         |
| MDK, pg/ml           | 1800 (703-4417)                   | 4695 (4275-5757)             | <0.001         |
| PD-L1, pg/ml         | 43.1 (35.5-55.6)                  | 61.3 (53.2-86.7)             | 0.001          |
| PD-1, pg/ml          | 14.7 (6.1-25.5)                   | 24.5 (13.5-43.4)             | 0.008          |
| CTLA-4, pg/ml        | 2.03 (0.60-4.89)                  | 0.60 (0.60-19.80)            | 0.883          |

\*Data are median (interquartile range). Comparisons were performed by Mann-Whitney test.

Abbreviations: OSA, obstructive sleep apnoea; TGF- $\beta$ , transforming growth factor beta; SMAD3, SMAD family member 3; CD137, 4-1BB or tumour necrosis factor receptor superfamily 9; MMP2, matrix metalloproteinase-2; PSPC1, paraspeckle component 1; MDK, midkine; PD-L1, programmed death-ligand 1; PD-1, programmed cell death 1; CTLA-4, cytotoxic T-Lymphocyte Antigen 4.

**Table S2.** Risk factors associated with a diagnosis of lung cancer\*

|                                                 | Regression coefficient |                | Odds ratio |             | r <sup>2</sup> | Change in r <sup>2</sup> | p-value |
|-------------------------------------------------|------------------------|----------------|------------|-------------|----------------|--------------------------|---------|
|                                                 | B                      | Standard error | Value      | 95%CI       |                |                          |         |
| Desaturation index, h <sub>1</sub> <sup>-</sup> | 0.061                  | 0.019          | 1.063      | 1.026-1.103 | 0.228          | 0.228                    | 0.001   |
| TGF-β, pg/ml                                    | 0.054                  | 0.029          | 0.056      | 0.997-1.118 | 0.268          | 0.040                    | 0.063   |
| Constant                                        | -2.753                 | 0.496          | -          | -           | -              | -                        | -       |

\*Sex, BMI, pack-years, previous COPD diagnosis and all sleep parameters and biomarkers with significant differences in the bivariate analysis were included.

Abbreviations: B, regression coefficient; CI, confidence interval; r<sup>2</sup>, coefficient of determination; TGF-β, transforming growth factor beta.

**Figure S1.** Relationship between serum levels of PSPC-1, MDK, PD-L1 and PD-1 with desaturation index in subjects from the SAILS cohort. r values correspond to Pearson correlation coefficients.

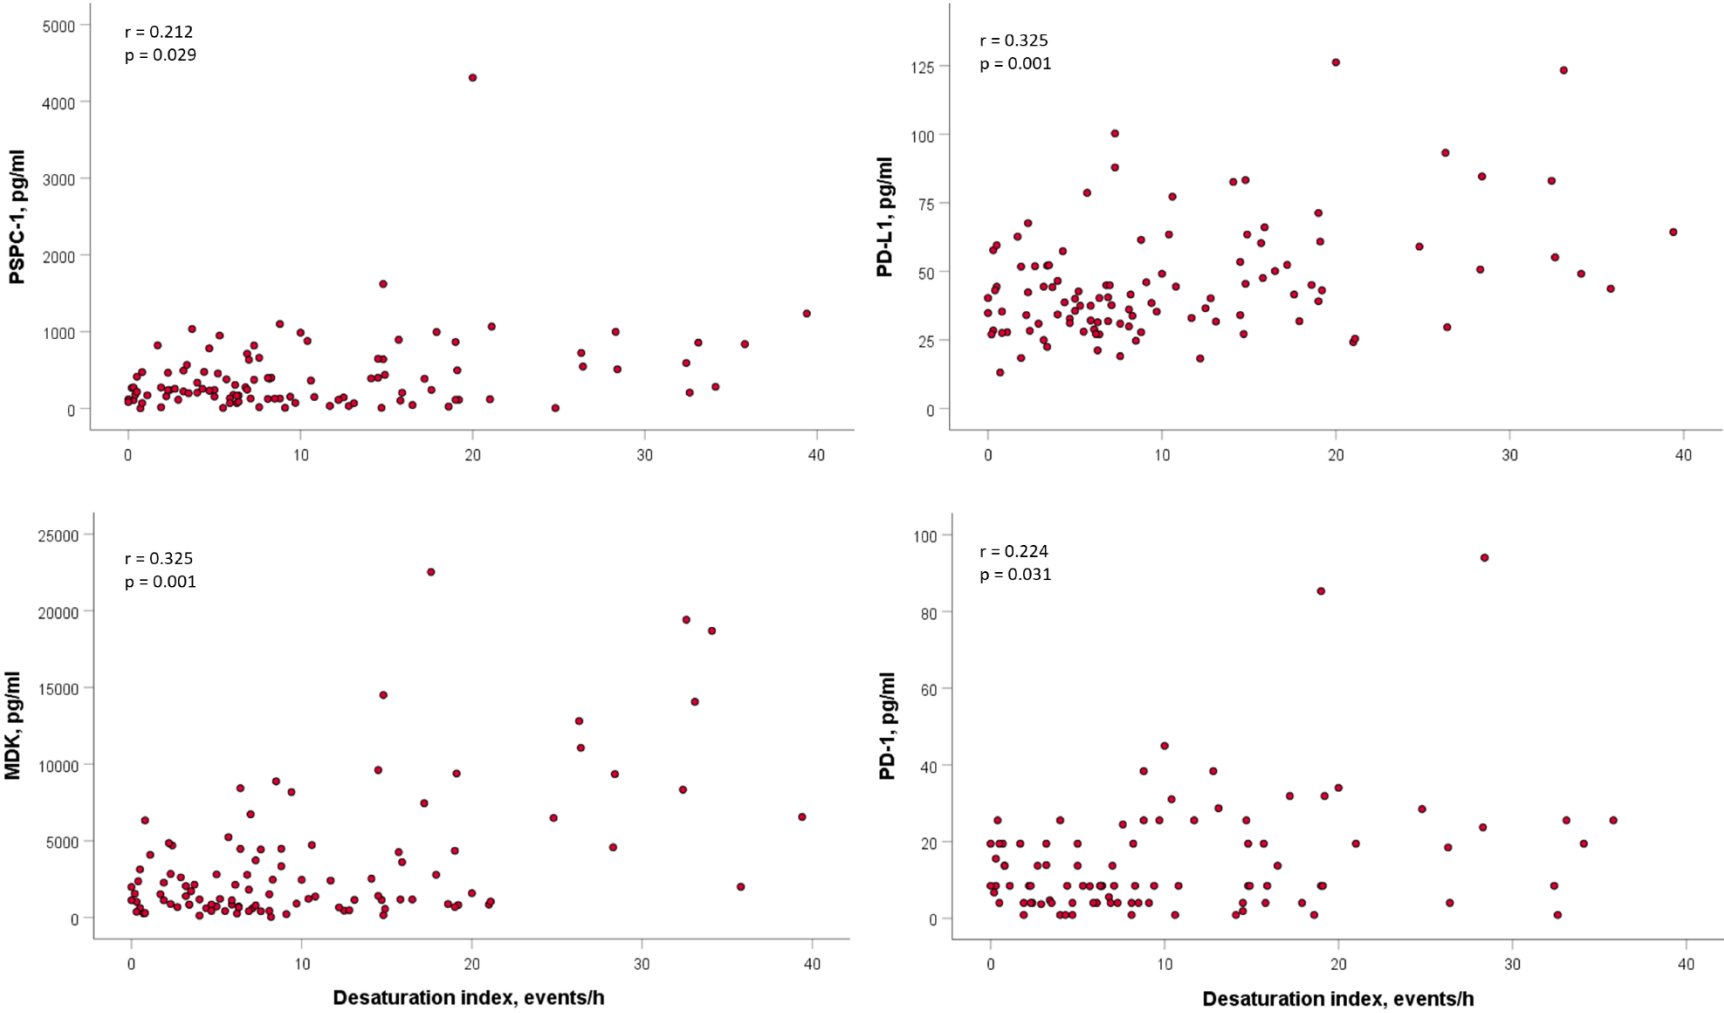

**Figure S2.** Relationship between serum levels of PSPC-1, MDK and PD-L1 with minimum saturation in subjects from the SAILS cohort. *r* values correspond to Pearson correlation coefficients.

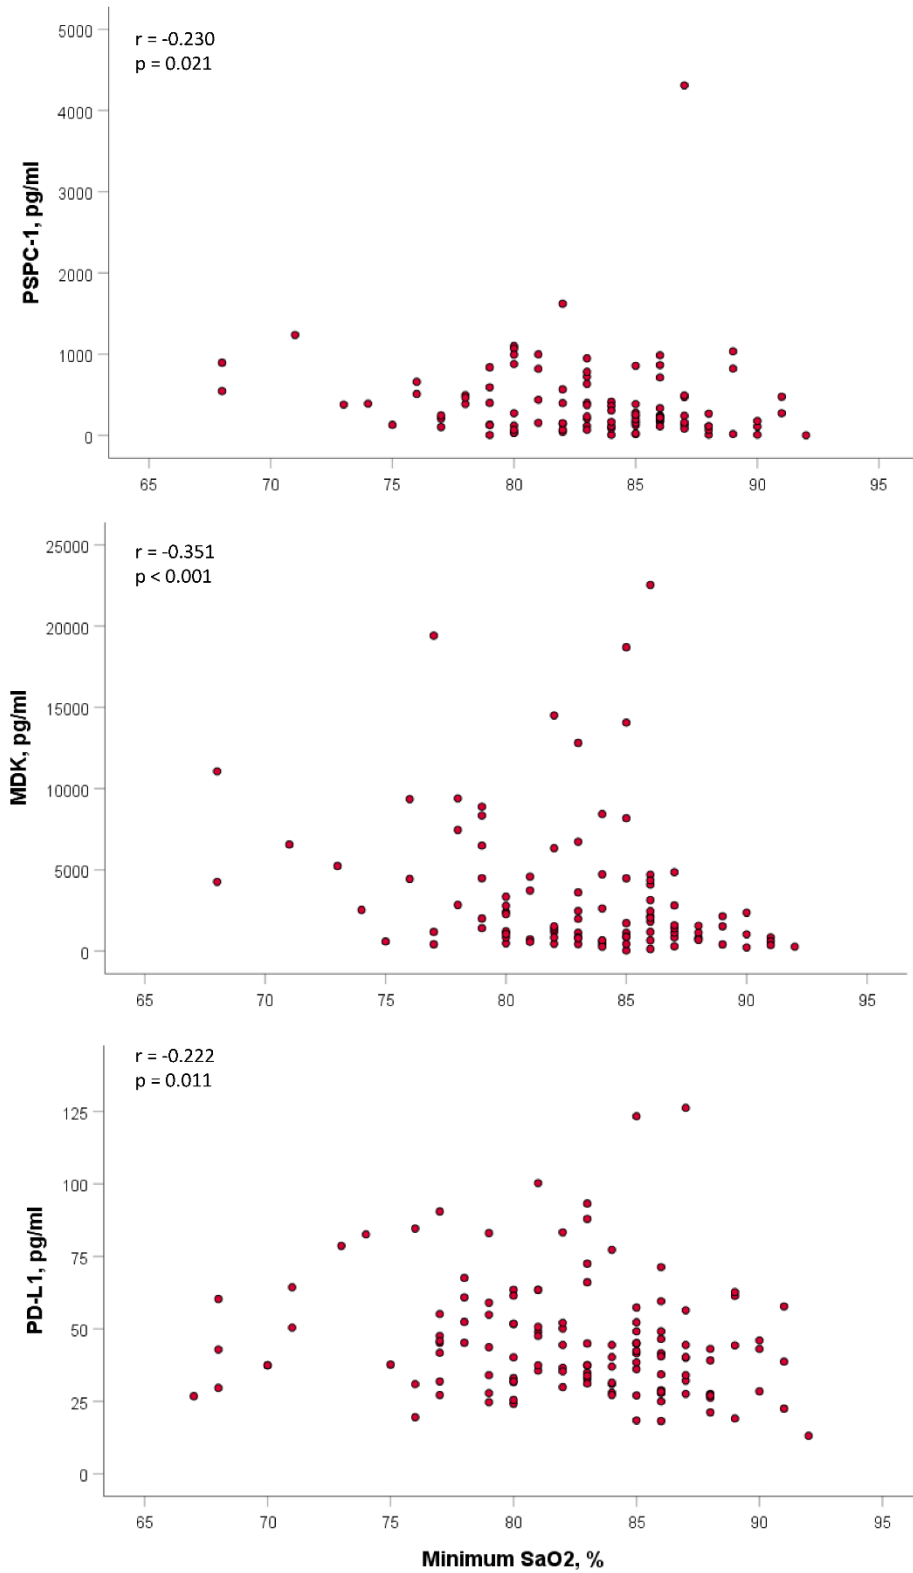

**Figure S3.** Relationship between serum levels of PSPC-1, TGF $\beta$ 1 and PD-L1 with mean saturation in subjects from the SAILS cohort. r values correspond to Pearson correlation coefficients.

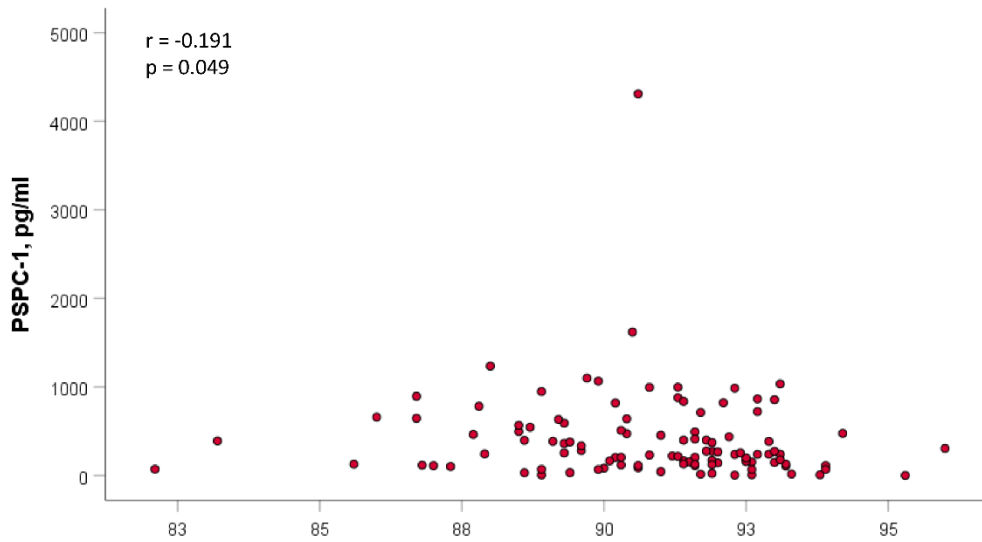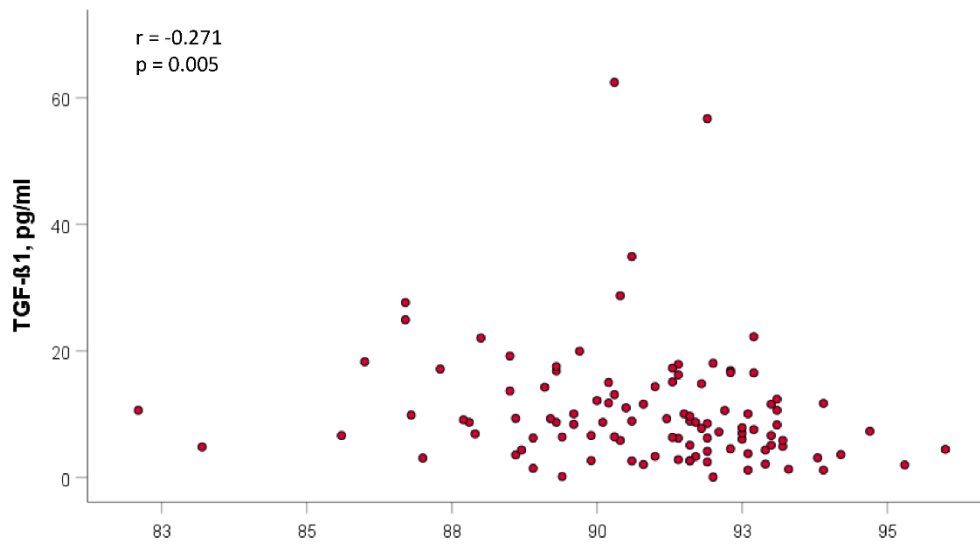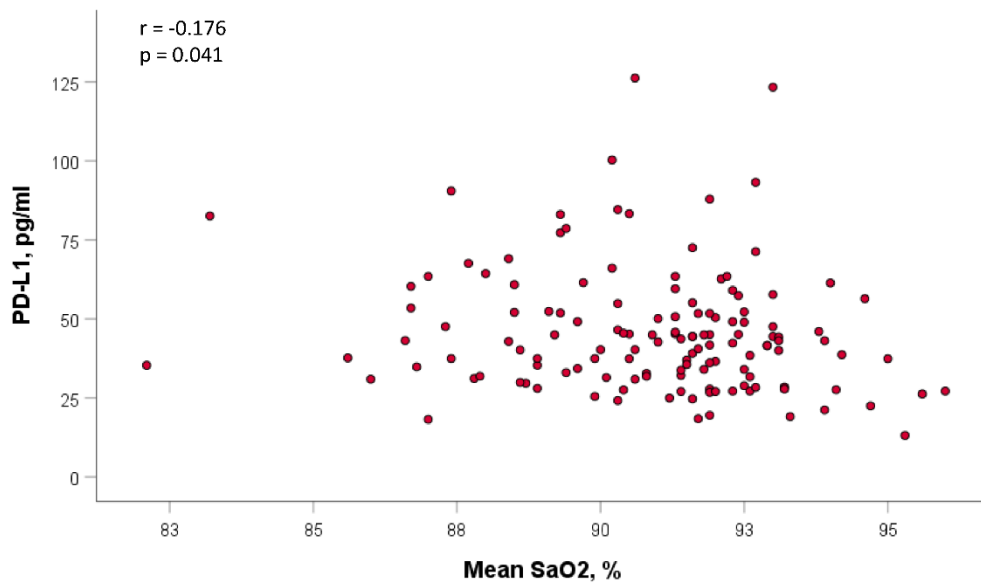

**Figure S4.** Relationship between serum levels of PSpC-1, TGFβ1 and PD-L1 with recording time with oxyhaemoglobin saturation less than 90% in subjects from the SAILS cohort. *r* values correspond to Pearson correlation coefficients.

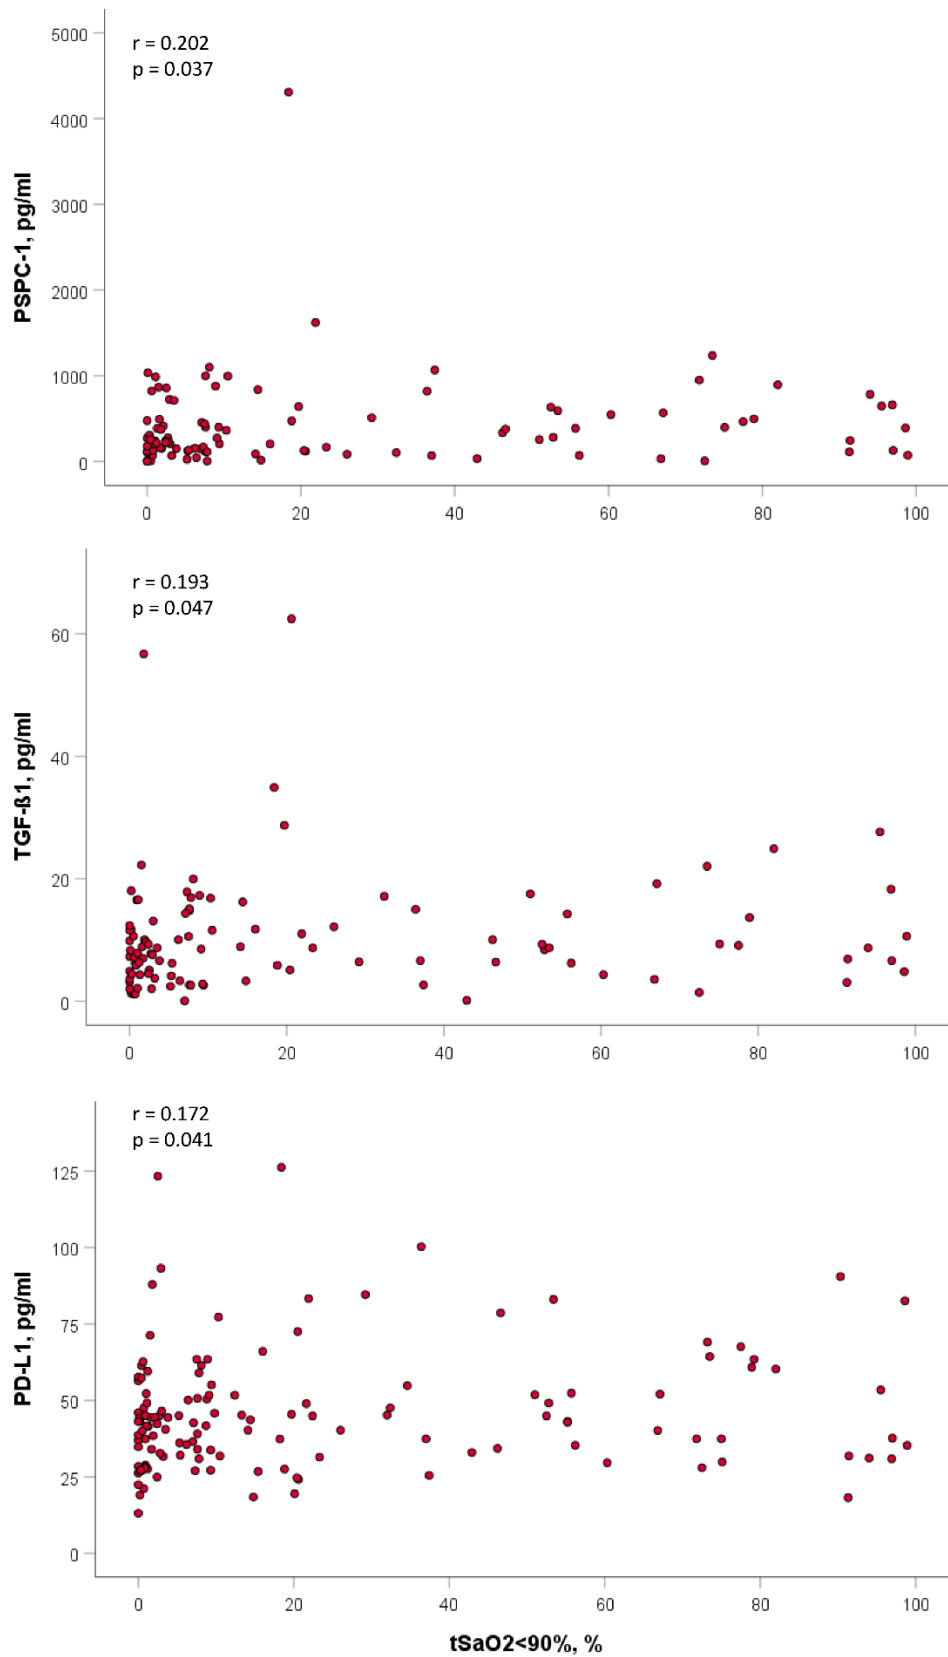



**Figure S5.** Relationship between serum levels of PSpC-1, TGF- $\beta$ 1, PD-L1 and PD-1 with desaturation index in subjects from the SAIL cohort. r values correspond to Pearson correlation coefficients.

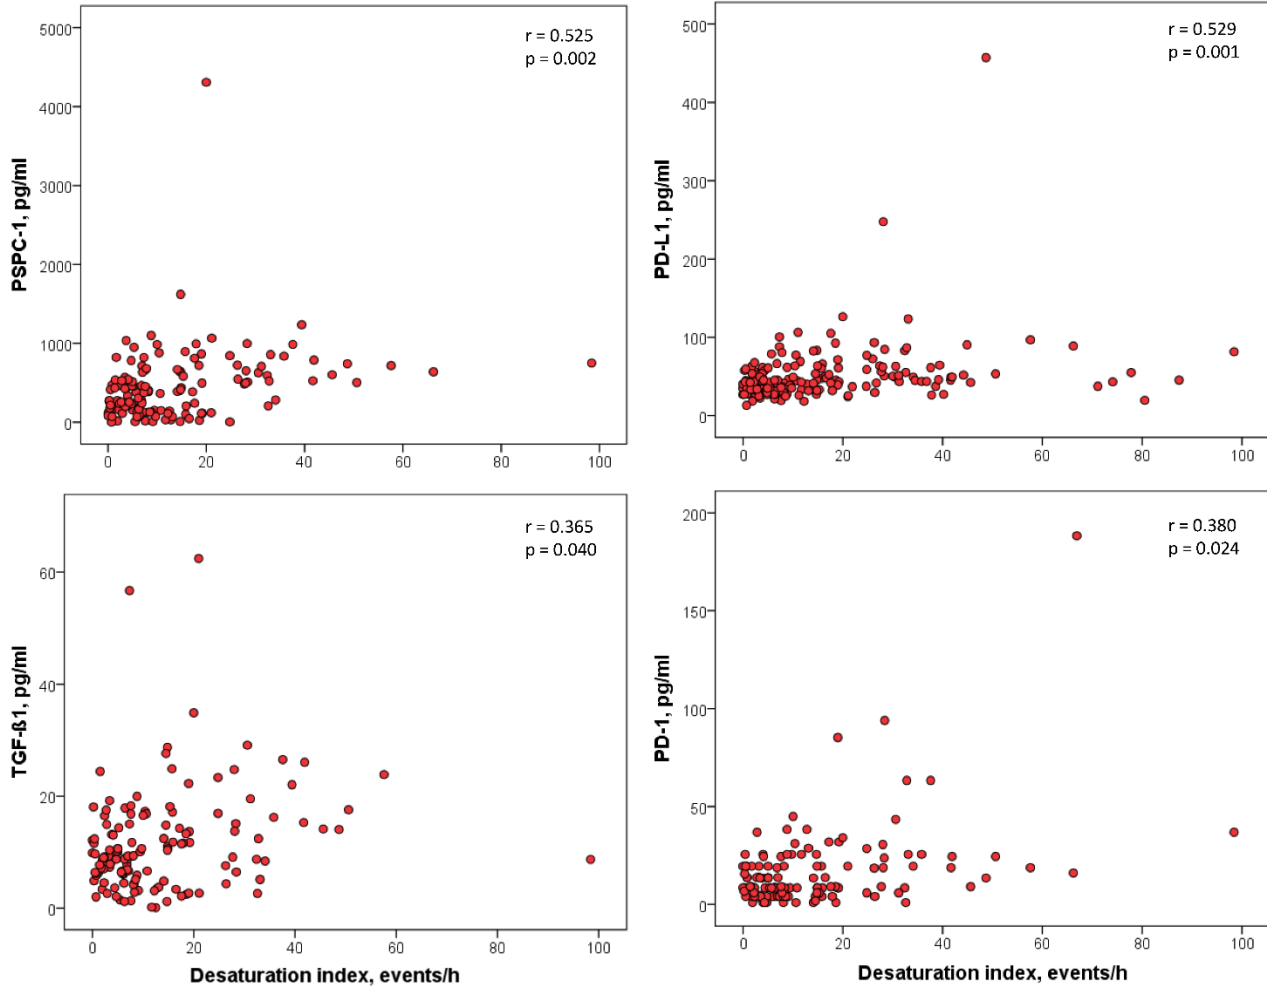

**Figure S6.** Relationship between serum levels of PSpC-1 and TGF- $\beta$ 1 with other hypoxemic indices in subjects from the SAIL cohort. r values correspond to Pearson correlation coefficients.

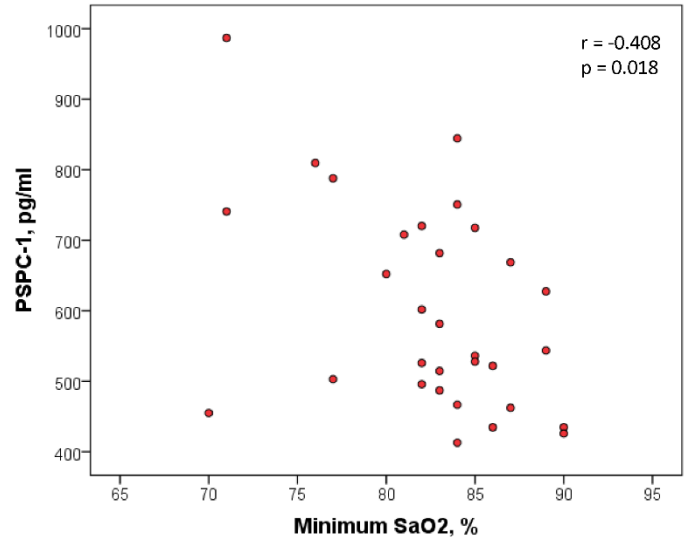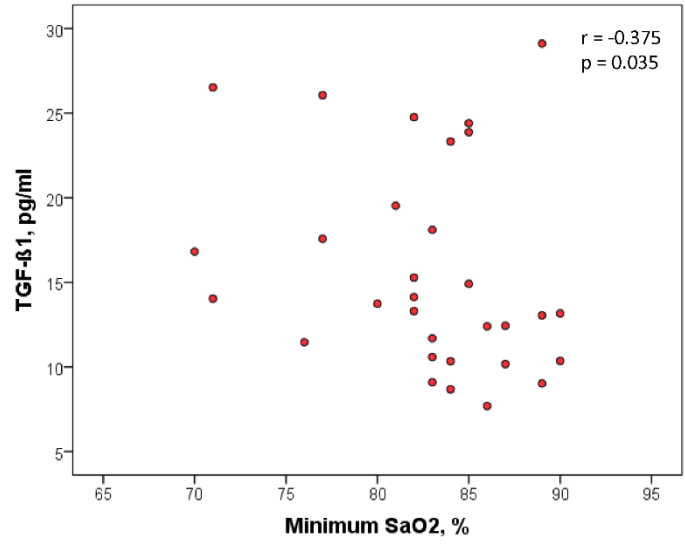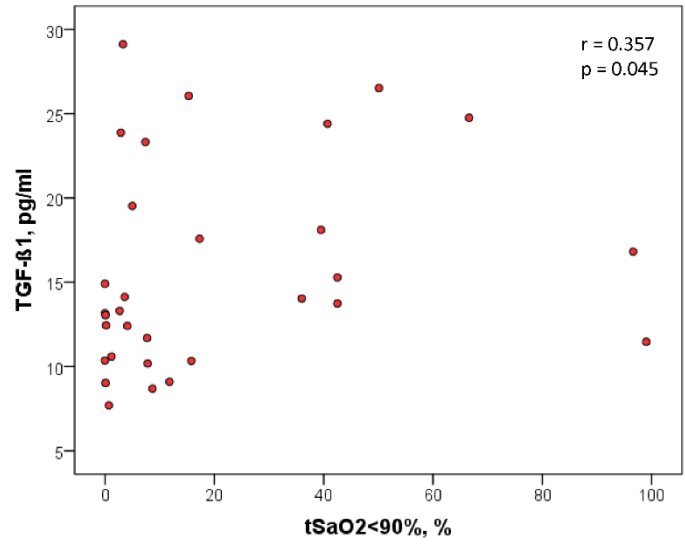

Supplement: 00777-2023.SUPPLEMENT.pdf [file 00777-2023.SUPPLEMENT.pdf]
